# Supplementary material
Source: publisher site journal article supplement (https://www.spandidos-publications.com/7710/downloadSupplementary)

Figure S1. ROC curves for each blood marker in both (A) pre-treatment and (B) post-treatment phases. ROC, receiver operating characteristic; NLR, neutrophil-to-lymphocyte ratio; LMR, lymphocyte-to-monocyte ratio; PNI, prognostic nutritional index; PLR, platelet-to-lymphocyte ratio; CAR, C-reactive protein-to-albumin ratio.

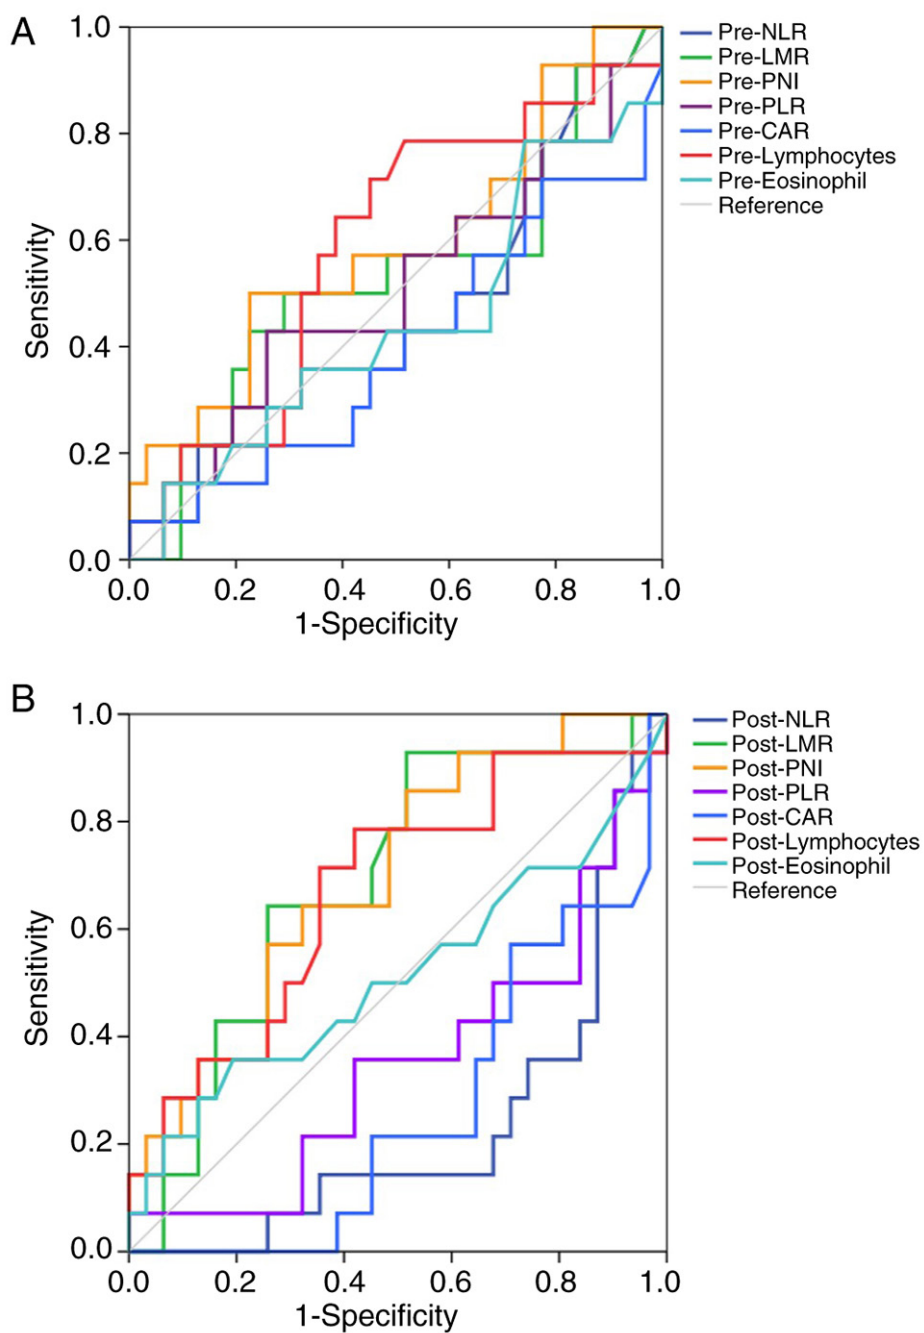

Supplement: Supplementary file 1 [file downloadSupplementary]
